# Supplementary material
Source: PubMed Central journal article supplement (PMC7116130)
Supplement: EMS95148-supplement-Supplementary_Material.pdf [file EMS95148-supplement-Supplementary_Material.pdf]

## ONLINE REPOSITORY

### CASE REPORT

We report on a 48-year-old female patient suffering from smoldering systemic mastocytosis with a history of multiple ( $n = 64$ ) episodes of life-threatening anaphylactic reactions. In 1998, therapy with H1- and H2-receptor blockers (desloratadine and ranitidine) was initiated. Since 2001, she also received levocetirizine (see [Table E6](#)). Despite this therapy, recurrent life-threatening anaphylactic reactions were recorded. The severity and frequency of these anaphylactic reactions as well as the high MC burden present in this patient (as assessed by bone marrow histology and serum tryptase levels) prompted us to initiate cytoreductive therapy with 2-chlorodeoxyadenosine (cladribine) (2CdA). Between December 2003 and October 2004, 6 subsequent cycles of 2CdA (0.13 mg/kg/d, days 1-5) were given. Treatment resulted in a marked decrease in the serum tryptase level ([Figure 3, A](#)) and a decrease in the MC burden confirmed by a bone marrow biopsy. In the next

11 months, no further severe symptoms were observed. However, 12 months after the last cycle of 2CdA she again started suffering from recurrent severe anaphylactic reactions. In May 2007, 30 months after the end of the first series of 2CdA cycles, a second series of 3 cycles of therapy with 2CdA (0.13 mg/kg/d; days 1-5) was initiated followed by a period without severe symptoms. In addition, a further decrease in serum tryptase level was observed ([Figure 3, A](#)). Similar to the first series, recurrence of severe events was observed 20 months after the completion of this series of 2CdA cycles. In 2014, treatment with omalizumab (300 mg subcutaneous every 3-4 weeks) was initiated and resulted in a marked improvement (see [Table E6](#)). No life-threatening events were recorded during the last 4 years when the patient received omalizumab. Serial measurements of total serum immunoglobulin (IgE) showed a clear increase following cytoreduction induced by 2CdA ([Figure 3, A](#)). Serum tryptase remained at relatively low levels for more than 6 years after cytoreductive therapy with 2CdA (despite recurrence of anaphylaxis).

TABLE E1. Characteristics of patients with mastocytosis

| Patient no. | Age (y) | Sex | Diagnosis (WHO) | Tryptase (ng/mL) | WBC (cells/ $\mu$ L) | Hemoglobin (g/dL) | Platelets (cells/ $\mu$ L) | Total IgE (kU/L) | History of allergic reactions | Type of allergen(s)          | Severity of symptoms     |
|-------------|---------|-----|-----------------|------------------|----------------------|-------------------|----------------------------|------------------|-------------------------------|------------------------------|--------------------------|
| 1           | 35      | F   | SSM             | 202              | 6,800                | 13.8              | 216,000                    | 12.10            | No                            | —                            | —                        |
| 2           | 46      | F   | ISM             | 938              | 6,450                | 13.6              | 279,000                    | NA               | Yes*                          | Birch, nuts, food, wasps     | Anaphylaxis              |
| 3           | 47      | F   | ISM             | 47.9             | 7,300                | 14.5              | 237,000                    | 10.20            | No                            | —                            | —                        |
| 4           | 55      | F   | SSM             | 352.5            | 4,860                | 13.1              | 280,000                    | <2.00            | NK                            | —                            | —                        |
| 5           | 34      | F   | ISM             | 45.6             | 5,910                | 12.3              | 288,000                    | 22.40            | Yes*                          | Wasps                        | Anaphylaxis              |
| 6           | 35      | F   | MIS             | NA               | NA                   | NA                | NA                         | 8.44             | No                            | —                            | —                        |
| 7           | 36      | M   | ISM             | 34.4             | 8,400                | 15.6              | 341,000                    | 47.80            | Yes*                          | Wasps, bees                  | Not reported             |
| 8           | 36      | F   | ISM             | 23.3             | 10,880               | 13.9              | 329,000                    | 473              | Yes                           | Birch, timothy grass, nuts   | Anaphylaxis              |
| 9           | 45      | M   | ISM             | 90.6             | 7,250                | 12.5              | 242,000                    | 6.80             | No                            | —                            | —                        |
| 10          | 26      | F   | ISM             | 68               | 3,750                | 13.3              | 204,000                    | 10.40            | No                            | —                            | —                        |
| 11          | 37      | F   | ISM             | 69.7             | 7,400                | 12.7              | 272,000                    | 33.90            | No                            | —                            | —                        |
| 12          | 37      | M   | ISM             | 33.5             | 7,280                | 14.8              | 307,000                    | 336              | No                            | —                            | —                        |
| 13          | 53      | M   | SM-AHN          | 204.0            | 35,490               | 16.4              | 287,000                    | 5.54             | No                            | —                            | —                        |
| 14          | 33      | F   | ISM             | 15.5             | 9,220                | 15                | 251,000                    | 5.55             | No                            | —                            | —                        |
| 15          | 38      | F   | CM              | 13.7             | 8,660                | 13.6              | 378,000                    | 177              | No                            | —                            | —                        |
| 16          | 59      | M   | ASM             | 285              | 6,760                | 9.6               | 115,000                    | 15.6             | No                            | —                            | —                        |
| 17          | 33      | M   | CM              | 12.4             | 10,000               | 15.8              | 158,000                    | 90.6             | No                            | —                            | —                        |
| 18          | 37      | F   | ISM             | 46.5             | 5,190                | 13.9              | 221,000                    | 12.4             | No                            | —                            | —                        |
| 19          | 31      | F   | ISM             | 17.9             | 6,620                | 13.5              | 256,000                    | 9.95             | No                            | —                            | —                        |
| 20          | 53      | F   | ISM             | 53.7             | 5,110                | 12.4              | 205,000                    | 70.2             | No                            | —                            | —                        |
| 21          | 36      | F   | CM              | 17.1             | 5,760                | 13.6              | 264,000                    | 39.1             | Yes                           | Birch, mugwort               | Rhinitis, conjunctivitis |
| 22          | 31      | F   | MIS             | 13.5             | 7,800                | 14.1              | 305,000                    | 87.5             | NK                            | —                            | —                        |
| 23          | 58      | M   | ISM             | 108              | 6,100                | 14.2              | 307,000                    | 11.3             | No                            | —                            | —                        |
| 24          | 42      | M   | ISM             | 14.5             | 5,450                | 14.3              | 265,000                    | 5.52             | No                            | —                            | —                        |
| 25          | 56      | M   | ISM             | 34.8             | 7,960                | 13.5              | 320,000                    | 17.5             | No                            | —                            | —                        |
| 26          | 48      | F   | SSM             | 1090             | 5,250                | 11.2              | 212,000                    | 17.0             | Yes                           | Timothy grass, mugwort, food | Anaphylaxis              |
| 27          | 64      | M   | ISM             | 164              | 10,480               | 16.1              | 206,000                    | NA               | No                            | —                            | —                        |
| 28          | 72      | M   | SM-AHN          | 77.7             | 2,950                | 12.2              | 101,000                    | 16.3             | No                            | —                            | —                        |
| 29          | 21      | M   | ASM             | 53.6             | 5,030                | 12.9              | 269,000                    | 29.2             | No                            | —                            | —                        |
| 30          | 62      | F   | ISM             | 25.6             | 5,410                | 14.8              | 257,000                    | 46.7             | No                            | —                            | —                        |
| 31          | 47      | F   | SM-AHN          | NA               | NA                   | NA                | NA                         | <2.00            | No                            | —                            | —                        |
| 32          | 50      | F   | SSM             | 175              | 3,820                | 12.8              | 193,000                    | 18.3             | No                            | —                            | —                        |
| 33          | 72      | M   | ASM             | 1,617            | 4,370                | 9.1               | 25,000                     | 12.6             | No                            | —                            | —                        |
| 34          | 40      | M   | SSM             | 937              | 3,980                | 12.8              | 201,000                    | 5.91             | No                            | —                            | —                        |
| 35          | 52      | F   | SM-AHN          | 379              | 7,250                | 10.2              | 86,000                     | 16.9             | No                            | —                            | —                        |
| 36          | 56      | M   | ISM             | 650              | 10,480               | 14.4              | 329,000                    | NA               | No                            | —                            | —                        |

|    |    |   |        |      |        |      |         |      |     |               |              |
|----|----|---|--------|------|--------|------|---------|------|-----|---------------|--------------|
| 37 | 53 | M | SM-AHN | 615  | 27,950 | 8.8  | 54,000  | 41.9 | No  | —             | —            |
| 38 | 73 | M | ISM    | 49.9 | 5,130  | 14.2 | 265,000 | 60.1 | Yes | Timothy grass | Not reported |
| 39 | 53 | M | ISM    | 17.1 | 4,360  | 15.1 | 215,000 | 8.63 | No  | —             | —            |
| 40 | 48 | F | ISM    | 78.5 | 4,690  | 13.6 | 237,000 | 6.65 | Yes | Birch         | Not reported |
| 41 | 45 | F | CM     | 6.1  | 5,720  | 13.2 | 269,000 | 124  | No  | —             | —            |
| 42 | 33 | F | ISM    | 45.5 | 8,960  | 12.1 | 274,000 | 4.90 | No  | —             | —            |

*ASM*, Aggressive systemic mastocytosis; *CM*, cutaneous mastocytosis; *f*, female; *ISM*, indolent systemic mastocytosis; *m*, male; *MIS*, mastocytosis in the skin; *NA*, not available; *NK*, not known; *SM-AHN*, systemic mastocytosis with an associated hematologic neoplasms; *SSM*, smoldering systemic mastocytosis; *WBC*, white blood cell count; *WHO*, World Health Organization.

\*In these patients, hypersensitivity reactions against bee or wasp were recorded. In patient number 5, a previous sting did not result in anaphylaxis but the second exposure resulted in a severe hypersensitivity reaction. In the other 2 patients, no history about previous stings was available.

**TABLE E2.** List of allergens spotted on the chip used in this study

| Allergen source             | Allergen    |
|-----------------------------|-------------|
| Kiwi fruit                  | Act d 1     |
| Kiwi fruit                  | Act d 2     |
| Kiwi fruit                  | Act d 5     |
| Kiwi fruit                  | Act d 8     |
| Alder                       | Aln g 1     |
| Alternaria plant rot fungus | Alt a 1     |
| Alternaria plant rot fungus | Alt a 6     |
| Ragweed                     | Amb a 1     |
| Cashew                      | Ana o 1     |
| Cashew                      | Ana o 2     |
| Cashew                      | Ana o 3     |
| Herring worm                | Ani s 1     |
| Herring worm                | Ani s 3     |
| Celery                      | Api g 1     |
| Honeybee                    | Api m 1     |
| Honeybee                    | Api m 2     |
| Honeybee                    | Api m 4     |
| Peanut                      | Ara h 1     |
| Peanut                      | Ara h 2     |
| Peanut                      | Ara h 3     |
| Peanut                      | Ara h 6     |
| Peanut                      | Ara h 8     |
| Peanut                      | Ara h 9     |
| Mugwort                     | Art v 1     |
| Mugwort                     | Art v 3     |
| Common mold                 | Asp f 1     |
| Common mold                 | Asp f 3     |
| Common mold                 | Asp f 6     |
| Brazil nut                  | Ber e 1     |
| European white birch        | Bet v 1     |
| European white birch        | Bet v 2     |
| European white birch        | Bet v 4     |
| German cockroach            | Bla g 1     |
| German cockroach            | Bla g 2     |
| German cockroach            | Bla g 5     |
| German cockroach            | Bla g 7     |
| Storage mite                | Blo t 5     |
| Domestic cattle             | Bos d 4     |
| Domestic cattle             | Bos d 5     |
| Domestic cattle             | Bos d 6     |
| Domestic cattle             | Bos d 8     |
| Domestic cattle             | BSA         |
| Milk                        | aS1-casein  |
| Milk                        | aS2-casein  |
| Milk                        | b-casein    |
| Milk                        | K-casein    |
| Milk                        | Lactoferrin |
| Dog                         | Can f 1     |
| Dog                         | Can f 2     |
| Dog                         | Can f 3     |
| Dog                         | Can f 4     |
| Dog                         | Can f 5     |
| Dog                         | Can f 6     |
| Goosefoot                   | Che a 1     |

(continued)

**TABLE E2.** (Continued)

| Allergen source          | Allergen     |
|--------------------------|--------------|
| Fungus of plants         | Cla h 8      |
| Hazelnut                 | Cor a 1.0401 |
| Hazelnut                 | Cor a 8      |
| Hazelnut                 | Cor a 9      |
| Sugi                     | Cry j 1      |
| Bermuda grass            | Cyn d 1      |
| Cypress                  | Cup a 1      |
| American house-dust mite | Der f 1      |
| American house-dust mite | Der f 2      |
| European house-dust mite | Der p 1      |
| European house-dust mite | Der p 2      |
| European house-dust mite | Der p 4      |
| European house-dust mite | Der p 5      |
| European house-dust mite | Der p 7      |
| European house-dust mite | Der p 10     |
| European house-dust mite | Der p 11     |
| European house-dust mite | Der p 14     |
| European house-dust mite | Der p 15     |
| European house-dust mite | Der p 18     |
| European house-dust mite | Der p 21     |
| European house-dust mite | Der p 23     |
| Domestic horse           | Equ c 1      |
| Domestic horse           | Equ c 3      |
| Common buckwheat         | Fag e 2      |
| Cat                      | Fel d 1      |
| Cat                      | Fel d 2      |
| Cat                      | Fel d 4      |
| Baltic cod               | Gad c 1      |
| Chicken                  | Gal d 1      |
| Chicken                  | Gal d 2      |
| Chicken                  | Gal d 3      |
| Chicken                  | Gal d 5      |
| Soybean                  | Gly m 4      |
| Soybean                  | Gly m 5      |
| Soybean                  | Gly m 6      |
| Latex                    | Hev b 1      |
| Latex                    | Hev b 3      |
| Latex                    | Hev b 5      |
| Latex                    | Hev b 6.01   |
| Latex                    | Hev b 8      |
| English walnut           | Jug r 1      |
| English walnut           | Jug r 2      |
| English walnut           | Jug r 3      |
| Storage mite             | Lep d 2      |
| Apple                    | Mal d 1      |
| Annual mercury           | Mer a 1      |
| Mouse                    | Mus m 1      |
| Bromelain                | MUXF3        |
| Olive                    | Ole e 1      |
| Olive                    | Ole e 5      |
| Olive                    | Ole e 6      |
| Olive                    | Ole e 7      |
| Olive                    | Ole e 8      |
| Olive                    | Ole e 9      |

(continued)

**TABLE E2.** (Continued)

| Allergen source          | Allergen      |
|--------------------------|---------------|
| Olive                    | Ole e 10      |
| Timothy grass pollen     | Phl p 1       |
| Timothy grass pollen     | Phl p 2       |
| Timothy grass pollen     | Phl p 4       |
| Timothy grass pollen     | Phl p 5       |
| Timothy grass pollen     | Phl p 6       |
| Timothy grass pollen     | Phl p 7       |
| Timothy grass pollen     | Phl p 11      |
| Timothy grass pollen     | Phl p 12      |
| Pellitory-of-the-Wall    | Par j 2       |
| Black tiger shrimp       | Pen m 1       |
| Black tiger shrimp       | Pen m 2       |
| Black tiger shrimp       | Pen m 4       |
| Pistachio                | Pis v 3       |
| London plane tree        | Pla a 1       |
| London plane tree        | Pla a 2       |
| London plane tree        | Pla a 3       |
| London plane tree        | Pla l 1       |
| Mediterranean paper wasp | Pol d 5       |
| Peach                    | Pru p 1       |
| Peach                    | Pru p 3       |
| Almond                   | Pru du 3      |
| Almond                   | Pru du 4      |
| Almond                   | Pru du 6      |
| Almond                   | Pru du 6.01   |
| Almond                   | Pru du 6.02   |
| Sesame                   | Ses i 1       |
| Wheat                    | Tri a 14      |
| Wheat                    | Tri a 19.0101 |
| Wheat                    | Tri a 36      |
| Yellow jacket            | Ves v 1       |
| Yellow jacket            | Ves v 5       |

*IUIS*, International Union of Immunological Societies.

The sources and names of the allergens according to *IUIS* are shown.

**TABLE E3.** Heat map of IgE reactivities detected in patients with mastocytosis as assessed by allergy chip-profiling (only those allergens for which at least 1 patient showed a positive result are shown). A detailed description of allergens is presented in [Table E4](#).

| Patient no. | Act d 1 | Aln g 1      | Amb a 1 | Api g 1 | Api m 1 | Api m 4 | Ara h 1 | Ara h 8 | Art v 1 | Bet v 1 |
|-------------|---------|--------------|---------|---------|---------|---------|---------|---------|---------|---------|
| 1           | 0       | 0            | 0       | 0       | 0       | 0       | 0       | 0       | 0       | 0       |
| 2           | 0       | 7.28†        | 0       | 0.48*   | 0       | 0       | 0       | 0.1     | 0       | 16.48‡  |
| 3           | 0       | 0            | 0       | 0       | 0       | 0       | 0       | 0       | 0       | 0       |
| 4           | 0       | 0            | 0       | 0       | 0       | 0       | 0       | 0       | 0       | 0       |
| 5           | 0       | 0            | 0       | 0       | 0       | 0       | 0       | 0       | 0       | 0       |
| 6           | 0       | 0.25         | 0       | 0       | 0       | 0       | 0       | 0.17    | 0       | 0.91*   |
| 7           | 0       | 0            | 0       | 0       | 0       | 0       | 0       | 0       | 0       | 0       |
| 8           | 0.18    | 0.15         | 0       | 0       | 0       | 0       | 0       | 0       | 0       | 0.71*   |
| 9           | 0       | 0            | 0       | 0       | 0       | 0       | 0       | 0       | 0       | 0       |
| 10          | 0       | 0            | 0       | 0       | 0       | 0       | 0       | 0       | 0       | 0       |
| 11          | 0       | 0            | 0       | 0       | 0       | 0       | 0       | 0       | 0       | 0       |
| 12          | 0       | 0            | 0       | 0       | 0.12    | 0.35*   | 0.19    | 0       | 0       | 0       |
| 13          | 0       | 0            | 0       | 0       | 0       | 0       | 0       | 0       | 0       | 0       |
| 14          | 0       | 0            | 0       | 0       | 0       | 0       | 0       | 0       | 0       | 0       |
| 15          | 0.18    | 0            | 0       | 0       | 0.75*   | 0       | 0       | 0       | 0       | 0       |
| 16          | 0       | 0            | 0       | 0       | 0       | 0       | 0       | 0       | 0       | 0       |
| 17          | 0       | 0            | 0       | 0       | 0       | 0       | 0       | 0       | 0       | 0       |
| 18          | 0       | 0            | 0       | 0       | 0       | 0       | 0       | 0       | 0       | 0       |
| 19          | 0       | 0            | 0       | 0       | 0       | 0       | 0       | 0       | 0       | 0       |
| 20          | 0       | 0            | 0       | 0       | 0       | 0       | 0       | 0       | 0       | 0       |
| 21          | 0       | 0.32*        | 6.17†   | 0       | 0       | 0       | 0       | 0       | 0       | 0.56*   |
| 22          | 0       | 0            | 0       | 0       | 0       | 0       | 0       | 0       | 0       | 0       |
| 23          | 0       | 0            | 0       | 0       | 0       | 0       | 0       | 0       | 0       | 0       |
| 24          | 0       | 0            | 0       | 0       | 0       | 0       | 0       | 0       | 0       | 0       |
| 25          | 0       | 0            | 0       | 0       | 0       | 0       | 0       | 0       | 0       | 0       |
| 26          | 0       | 0            | 0       | 0       | 0       | 0       | 0       | 0       | 1.22†§  | 0       |
| 27          | 0       | 0            | 0       | 0       | 0       | 0       | 0       | 0       | 0       | 0       |
| 28          | 0       | 0            | 0       | 0       | 0       | 0       | 0       | 0       | 0       | 0       |
| 29          | 0       | 0            | 0       | 0       | 0       | 0       | 0       | 0       | 0       | 0       |
| 30          | 0       | 0            | 0       | 0       | 0       | 0       | 0       | 0       | 0       | 0       |
| 31          | 0       | 0            | 0       | 0       | 0       | 0       | 0       | 0       | 0       | 0       |
| 32          | 0       | 0            | 0       | 0       | 0       | 0       | 0       | 0       | 0       | 0       |
| 33          | 0       | 0            | 0       | 0       | 0       | 0       | 0       | 0       | 0       | 0       |
| 34          | 0       | 0            | 0       | 0       | 0       | 0       | 0       | 0       | 0       | 0       |
| 35          | 0       | 0            | 0       | 0       | 0       | 0       | 0       | 0       | 0       | 0       |
| 36          | 0       | 0            | 0       | 0       | 0       | 0       | 0       | 0       | 0       | 0       |
| 37          | 0       | 0            | 0       | 0       | 0       | 0       | 0       | 0       | 0       | 0       |
| 38          | 0       | 0            | 0       | 0       | 0       | 0       | 0       | 0       | 0       | 0       |
| 39          | 0       | 0            | 0       | 0       | 0       | 0       | 0       | 0       | 0       | 0       |
| 40          | 0       | 2.14†        | 0       | 0       | 0       | 0       | 0       | 0.19    | 0       | 8.15†   |
| 41          | 0       | 0            | 0       | 0       | 0       | 0       | 0       | 0       | 0       | 0       |
| 42          | 0       | 0            | 0       | 0       | 0       | 0       | 0       | 0       | 0       | 0       |
| Patient no. | Can f 3 | Cor a 1.0401 | Cyn d 1 | Cup a 1 | Der f 2 | Der p 2 | Fel d 2 | Gal d 1 | Lep d 2 | Mal d 1 |
| 1           | 0       | 0            | 0       | 0       | 0       | 0       | 0       | 0       | 0       | 0       |
| 2           | 0       | 5.2†         | 0       | 0       | 0       | 0       | 0       | 0       | 0       | 1.73†   |
| 3           | 0       | 0            | 0       | 0       | 0       | 0       | 0       | 0       | 0       | 0       |
| 4           | 0       | 0            | 0       | 0       | 0       | 0       | 0       | 0       | 0       | 0       |
| 5           | 0       | 0            | 0       | 0       | 0       | 0       | 0       | 0       | 0       | 0       |
| 6           | 0       | 0.09         | 0       | 0       | 0       | 0       | 0       | 0       | 0       | 0       |
| 7           | 0       | 0            | 0       | 0       | 0.08    | 0.11    | 0       | 0       | 0       | 0       |
| 8           | 0.24    | 1.18†        | 0.12    | 0       | 0       | 0       | 0.26    | 0       | 0       | 0.22    |
| 9           | 0       | 0            | 0       | 0       | 0       | 0       | 0       | 0       | 0       | 0       |
| 10          | 0       | 0            | 0       | 0       | 0       | 0       | 0       | 0       | 0       | 0       |

(continued)

TABLE E3. (Continued)

| Patient no. | Can f 3 | Cor a 1.0401 | Cyn d 1 | Cup a 1 | Der f 2 | Der p 2 | Fel d 2 | Gal d 1 | Lep d 2 | Mal d 1 |
|-------------|---------|--------------|---------|---------|---------|---------|---------|---------|---------|---------|
| 11          | 0       | 0            | 0       | 0       | 0       | 0       | 0       | 0       | 0       | 0       |
| 12          | 0       | 0            | 0       | 0       | 0       | 0       | 0       | 0       | 0       | 0       |
| 13          | 0       | 0            | 0       | 0       | 0       | 0       | 0       | 0       | 0       | 0       |
| 14          | 0       | 0            | 0       | 0       | 0       | 0       | 0       | 0       | 0       | 0       |
| 15          | 0       | 0            | 0       | 0       | 0       | 0       | 0       | 0.12    | 0       | 0       |
| 16          | 0       | 0            | 0       | 0       | 0       | 0       | 0       | 0       | 0       | 0       |
| 17          | 0       | 0            | 0       | 0       | 0       | 0       | 0       | 0       | 0       | 0       |
| 18          | 0       | 0            | 0       | 0       | 0       | 0       | 0       | 0       | 0       | 0       |
| 19          | 0       | 0            | 0.34*   | 0       | 0       | 0       | 0       | 0       | 0       | 0       |
| 20          | 0       | 0            | 0       | 0       | 0       | 0       | 0       | 0       | 0       | 0       |
| 21          | 0       | 0.2          | 0       | 0.11    | 0       | 0       | 0       | 0       | 0       | 0       |
| 22          | 0       | 0            | 0       | 0       | 0       | 0       | 0       | 0       | 0       | 0       |
| 23          | 0       | 0            | 0       | 0       | 0       | 0       | 0       | 0       | 0       | 0       |
| 24          | 0       | 0            | 0       | 0       | 0       | 0       | 0       | 0       | 0       | 0       |
| 25          | 0       | 0            | 0       | 0       | 0       | 0       | 0       | 0       | 0       | 0       |
| 26          | 0       | 0            | 0.84*§  | 0       | 0       | 0       | 0       | 0       | 0       | 0       |
| 27          | 0       | 0            | 0       | 0       | 0       | 0       | 0       | 0       | 0       | 0       |
| 28          | 0       | 0            | 0       | 0       | 0       | 0       | 0       | 0       | 0       | 0       |
| 29          | 0       | 0            | 0       | 0       | 0       | 0       | 0       | 0.08    | 0       | 0       |
| 30          | 0       | 0            | 0       | 0       | 0       | 0       | 0       | 0       | 0       | 0       |
| 31          | 0       | 0            | 0       | 0       | 0       | 0       | 0       | 0       | 0       | 0       |
| 32          | 0       | 0            | 0       | 0       | 0       | 0       | 0       | 0       | 0       | 0       |
| 33          | 0       | 0            | 0       | 0       | 0       | 0       | 0       | 0       | 0       | 0       |
| 34          | 0       | 0            | 0       | 0       | 0       | 0       | 0       | 0       | 0       | 0       |
| 35          | 0       | 0            | 0       | 0       | 0       | 0       | 0       | 0       | 0       | 0       |
| 36          | 0       | 0            | 0       | 0       | 0       | 0       | 0       | 0       | 0       | 0       |
| 37          | 0       | 0            | 0       | 0       | 0       | 0       | 0       | 0       | 0       | 0       |
| 38          | 0       | 0            | 0       | 0       | 0       | 0       | 0       | 0       | 0       | 0       |
| 39          | 0       | 0            | 0       | 0       | 0       | 0       | 0       | 0       | 0       | 0       |
| 40          | 0       | 0.75*        | 0       | 0       | 0.21    | 0.29    | 0       | 0       | 0.34*   | 0       |
| 41          | 0       | 0            | 0       | 0       | 0       | 0       | 0       | 0       | 0       | 0       |
| 42          | 0       | 0            | 0       | 0       | 0       | 0       | 0       | 0       | 0       | 0       |

  

| Patient no. | Ole e 1 | Phl p 1 | Phl p 4 | Phl p 5 | Pol d 5 | Pru p 1 | Pru du 3 | Ves v 5 |
|-------------|---------|---------|---------|---------|---------|---------|----------|---------|
| 1           | 0       | 0       | 0       | 0       | 0       | 0       | 0        | 0       |
| 2           | 0       | 0       | 0       | 0       | 0       | 0.44*   | 0        | 0       |
| 3           | 0       | 0       | 0       | 0       | 0       | 0       | 0        | 0       |
| 4           | 0       | 0       | 0       | 0       | 0       | 0       | 0        | 0       |
| 5           | 0       | 0       | 0       | 0       | 0       | 0       | 0        | 0.87*   |
| 6           | 0       | 0       | 0       | 0       | 0       | 0       | 0        | 0       |
| 7           | 0       | 0       | 0       | 0       | 0       | 0       | 0        | 2.2†    |
| 8           | 1.01†   | 0.76*   | 0       | 1†      | 0.27    | 0.15    | 0        | 0.58*   |
| 9           | 0       | 0       | 0       | 0       | 0       | 0       | 0        | 0       |
| 10          | 0       | 0       | 0       | 0       | 0       | 0       | 0        | 0       |
| 11          | 0       | 0       | 0       | 0       | 0       | 0       | 0        | 0       |
| 12          | 0       | 0       | 0.2     | 0       | 0       | 0       | 0        | 0.32*   |
| 13          | 0       | 0       | 0       | 0       | 0       | 0       | 0        | 0       |
| 14          | 0       | 0       | 0       | 0       | 0       | 0       | 0        | 0       |
| 15          | 0       | 0       | 0       | 0       | 0       | 0       | 0.21     | 0       |
| 16          | 0       | 0       | 0.2     | 0       | 0       | 0       | 0        | 0.12    |
| 17          | 0       | 0       | 0       | 0       | 0       | 0       | 0        | 0       |
| 18          | 0       | 0       | 0       | 0       | 0.09    | 0       | 0        | 1.74†   |
| 19          | 0       | 0.68*   | 0       | 0.67*   | 0       | 0       | 0        | 0       |
| 20          | 0       | 0       | 0.17    | 0       | 0       | 0       | 0        | 0.1     |
| 21          | 0       | 0       | 0       | 0       | 0       | 0.11    | 0        | 0       |

(continued)

TABLE E3. (Continued)

| Patient no. | Ole e 1 | Phl p 1 | Phl p 4 | Phl p 5 | Pol d 5 | Pru p 1 | Pru du 3 | Ves v 5 |
|-------------|---------|---------|---------|---------|---------|---------|----------|---------|
| 22          | 0       | 0       | 0       | 0       | 0       | 0       | 0        | 0.1     |
| 23          | 0       | 0       | 0       | 0       | 0       | 0       | 0        | 0       |
| 24          | 0       | 0       | 0       | 0       | 0       | 0       | 0        | 0       |
| 25          | 0       | 0       | 0       | 0       | 0       | 0       | 0        | 0       |
| 26          | 1.63†§  | 0.58*§  | 0.71*§  | 0       | 0.6*§   | 0       | 0        | 1.66†§  |
| 27          | 0       | 0       | 0       | 0       | 0       | 0       | 0        | 0       |
| 28          | 0       | 0       | 0       | 0       | 0       | 0       | 0        | 0       |
| 29          | 0       | 0       | 0       | 0       | 0       | 0       | 0        | 0       |
| 30          | 0       | 0       | 0       | 0       | 0       | 0       | 0        | 0       |
| 31          | 0       | 0       | 0       | 0       | 0       | 0       | 0        | 0       |
| 32          | 0       | 0       | 0       | 0       | 0       | 0       | 0        | 0       |
| 33          | 0       | 0       | 0       | 0       | 0       | 0       | 0        | 0       |
| 34          | 0       | 0       | 0       | 0       | 0       | 0       | 0        | 0       |
| 35          | 0       | 0       | 0       | 0       | 0       | 0       | 0        | 0       |
| 36          | 0       | 0       | 0       | 0       | 0       | 0       | 0        | 0       |
| 37          | 0       | 0       | 0.11    | 0       | 1.37†   | 0.08    | 0        | 1.88†   |
| 38          | 0       | 0       | 0       | 0.56*   | 0       | 0       | 0        | 0       |
| 39          | 0       | 0.31*   | 0       | 0       | 0       | 0       | 0        | 0       |
| 40          | 0.32*   | 0       | 0       | 0       | 0       | 0       | 0        | 0       |
| 41          | 0       | 0       | 0       | 0       | 0       | 0       | 0        | 0       |
| 42          | 0       | 0       | 0       | 0       | 0       | 0       | 0        | 0       |

Sera obtained from 42 patients with mastocytosis were analyzed using microarrayed allergens. Levels of specific IgE were semi-quantified by Microarray Image Analyzer v3.1.2 software and expressed by ISU. For positivity, a cutoff of 0.3 ISU was used. Chip scoring system: <0.3 ISU below cutoff. A detailed description of allergens is presented in the Table E4.

\*Class 1:  $\geq 0.3$  to <1, ISU low.

†Class 2:  $\geq 1$  to  $\leq 10$  ISU, moderate to high.

‡Class 3: >10 ISU, very high.

§In this patient, allergen-chip detected sensitization against various allergens after treatment-induced reduction of the MC burden.



**TABLE E4.** Description of allergens shown in [Figure E3](#)

| No. | Allergen source             | Name/function of the protein                | Allergen     |
|-----|-----------------------------|---------------------------------------------|--------------|
| 1   | Kiwi fruit                  | Thaumatococin-like protein                  | Act d 2      |
| 2   | Alder                       | PR-10, Bet v 1 family member                | Aln g 1      |
| 3   | Alternaria plant rot fungus | Acidic glycoprotein                         | Alt a 1      |
| 4   | Ragweed                     | Pectate lyase                               | Amb a 1      |
| 5   | Celery                      | PR-10, Bet v 1 family member                | Api g 1      |
| 6   | Honeybee                    | Phospholipase A2                            | Api m 1      |
| 7   | Honeybee                    | Hyaluronidase                               | Api m 4      |
| 8   | Peanut                      | PR-10, Bet v 1 family member                | Ara h 8      |
| 9   | Mugwort                     | Defensin-like protein                       | Art v 1      |
| 10  | European white birch        | PR-10, Bet v 1 family member                | Bet v 1      |
| 11  | European white birch        | Profilin                                    | Bet v 2      |
| 12  | European white birch        | Polcalcin                                   | Bet v 4      |
| 13  | Dog                         | Lipocalin                                   | Can f 1      |
| 14  | Goosefoot                   | Ole e 1-related protein (trypsin inhibitor) | Che a 1      |
| 15  | Hazelnut                    | PR-10, Bet v 1 family member                | Cor a 1.0401 |
| 16  | Japanese cedar              | Pectate lyase                               | Cry j 1      |
| 17  | Cypress                     | Cypress                                     | Cup a 1      |
| 18  | Bermuda grass               | Beta-expansin                               | Cyn d 1      |
| 19  | American house-dust mite    | NPC2 family                                 | Der f 2      |
| 20  | European house-dust mite    | NPC2 family                                 | Der p 2      |
| 21  | Cat                         | Uteroglobin                                 | Fel d 1      |
| 22  | Latex                       | Profilin                                    | Hev b 8      |
| 23  | English walnut              | Vicilin seed storage protein                | Jug r 2      |
| 24  | Storage mite                | NPC2 family                                 | Lep d 2      |
| 25  | Apple                       | PR-10, Bet v 1 family member                | Mal d 1      |
| 26  | Annual mercury              | Profilin                                    | Mer a 1      |
| 27  | Olive                       | Ole e 1-related protein (trypsin inhibitor) | Ole e 1      |
| 28  | Timothy grass pollen        | Beta-expansin                               | Phl p 1      |
| 29  | Timothy grass pollen        | Grass group 2/3                             | Phl p 2      |
| 30  | Timothy grass pollen        | Grass group 4 (Berberine bridge enzyme)     | Phl p 4      |
| 31  | Timothy grass pollen        | Grass group 5                               | Phl p 5      |
| 32  | Timothy grass pollen        | Grass group 5/6                             | Phl p 6      |
| 33  | Timothy grass pollen        | Polcalcin                                   | Phl p 7      |
| 34  | Timothy grass pollen        | Ole e 1-related protein (trypsin inhibitor) | Phl p 11     |
| 35  | Timothy grass pollen        | Profilin                                    | Phl p 12     |
| 36  | London plane tree           | Polygalacturonase                           | Pla a 2      |
| 37  | English plantain            | Ole e 1-related protein (Pectate lyase)     | Pla 1 1      |
| 38  | Mediterranean paper wasp    | Antigen 5                                   | Pol d 5      |
| 39  | Peach                       | PR-10, Bet v 1 family member                | Pru p 1      |
| 40  | Almond                      | Profilin                                    | Pru du 4     |
| 41  | Yellow jacket               | Antigen 5                                   | Ves v 5      |

IUIS, International Union of Immunological Societies; *PR-10*, pathogenesis-related protein 10. The sources and names of the allergens according to IUIS are shown.

**TABLE E5.** Evaluation of allergen-microarray in various cohorts

| Study population | Allergic individuals among all patients, n (%) | Positive IgE reactivity by allergen-microarray testing in patients, n (%) | Mediator-induced symptoms of patients with allergies (previous studies) or mastocytosis (this study) | Reference                     |
|------------------|------------------------------------------------|---------------------------------------------------------------------------|------------------------------------------------------------------------------------------------------|-------------------------------|
| BAMSE            | 546/786 (69.5%)*                               | 409/786 (52%)*                                                            | Asthma, rhinitis, asthma and/or rhinitis                                                             | Wickman et al <sup>E1</sup>   |
| BAMSE            | 122/686 (17.8%)*                               | 173/686 (25.2%)*                                                          | Rhinitis                                                                                             | Westman et al <sup>E2</sup>   |
| EGEA             | 197/340 (57.9%)†                               | 166/340 (48.8%)                                                           | Asthma, rhinitis                                                                                     | Siroux et al <sup>E3</sup>    |
| ECA              | 83/132 (62.9%)*                                | 132/265 (49.8%)*                                                          | Asthma                                                                                               | Skrindo et al <sup>E4</sup>   |
|                  | 109/132 (83.1%)*                               | 132/265 (49.8%)*                                                          | Rhinitis                                                                                             |                               |
| Mastocytosis     | 9/42 (21%)‡                                    | 15/42 (35.7%)                                                             | Mediator-related symptoms§                                                                           | Smiljkovic et al (this study) |

BAMSE, Barn/Children, Allergy, Milieu, Stockholm, Epidemiological study; ECA, environment and childhood asthma; EGEA, asthma, bronchial hyperresponsiveness and atopy.

\*Samples tested at age 16 y and allergic status confirmed with asthma, rhinitis, asthma, and/or rhinitis at age 16 y.

†Allergic sensitization determined on the basis of ≥1 positive skin prick test result among the 11 allergen sources.

‡Based on reported allergy in patient history.

§Mediator-related symptoms: flush, vascular instability, anaphylaxis, rhinitis, headache, diarrhea.

**TABLE E6.** Therapy of the patient during follow-up

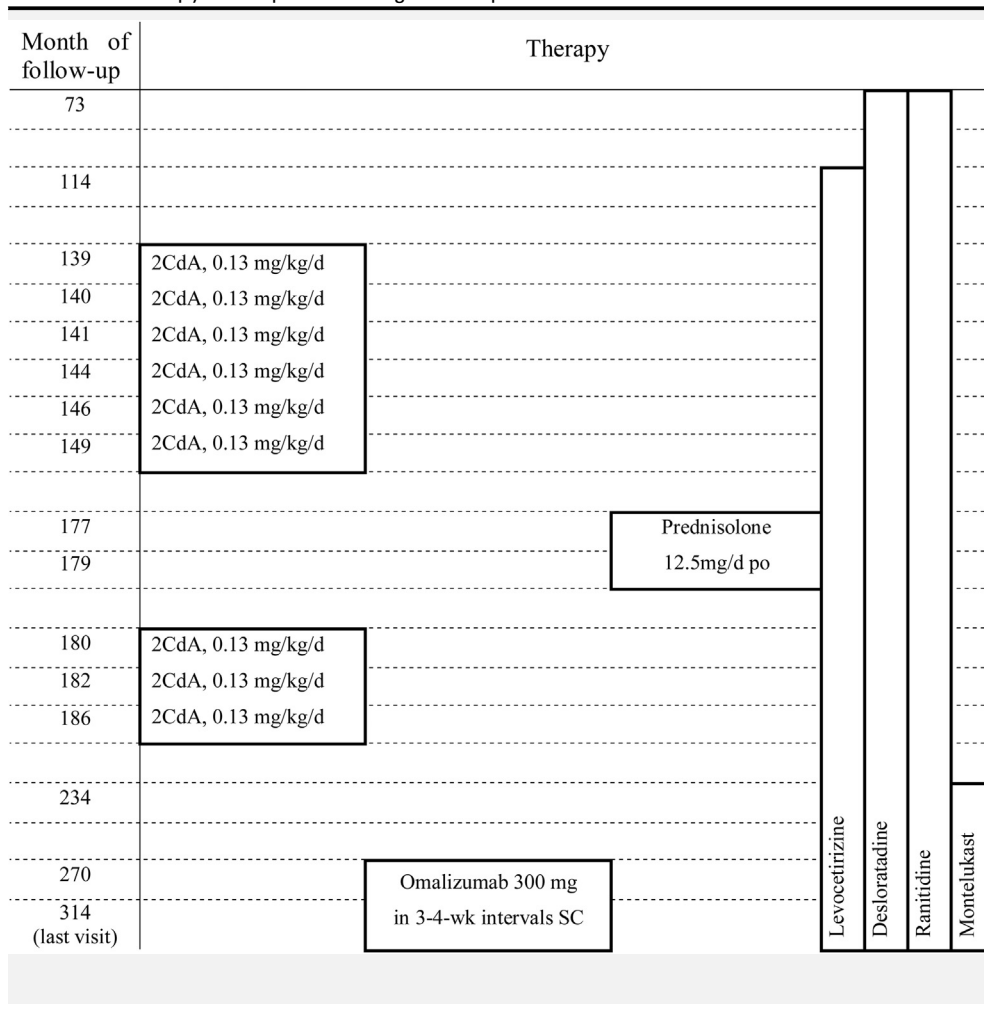

po, Per os (by mouth).

2CdA was given intravenously 0.13 mg/kg/d for 5 d per cycle. Orally administered medication was ranitidine 300 mg twice daily, desloratadine 5 mg once daily, montelukast 10 mg once daily, and levocetirizine 5 mg once daily. Omalizumab 300 mg was given subcutaneously (SC) in 3-4-wk intervals.

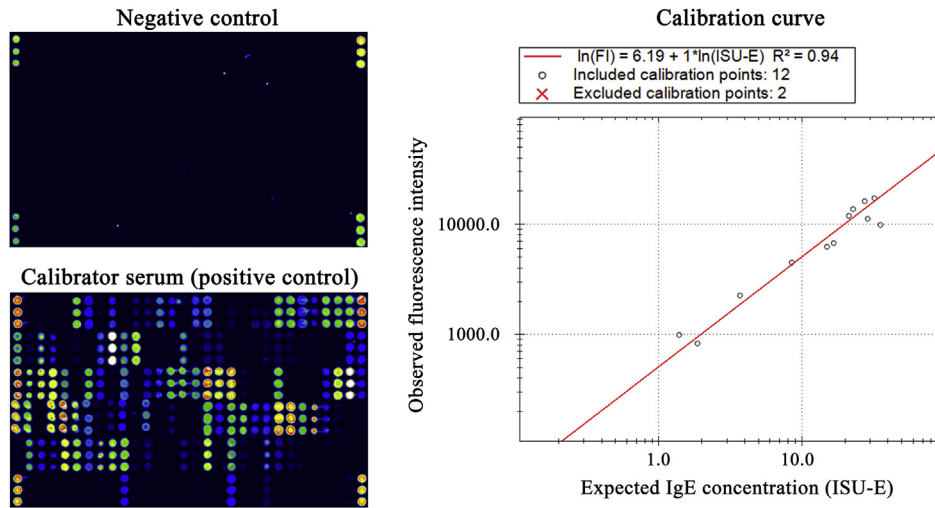

**FIGURE E1.** Calibration curve plus positive and negative controls for microarray analyses. Fluorescence signal intensities of the dots are encoded, with red dots representing high levels of allergen-specific IgE and blue color corresponding to low IgE levels as measured by a confocal laser-scanner. Levels of specific IgE were semi-quantified by Microarray Image Analyzer v3.1.2 software and expressed by ImmunoCAP Solid-phase Allergen-Chip standardized units for IgE. *FI*, fluorescence.

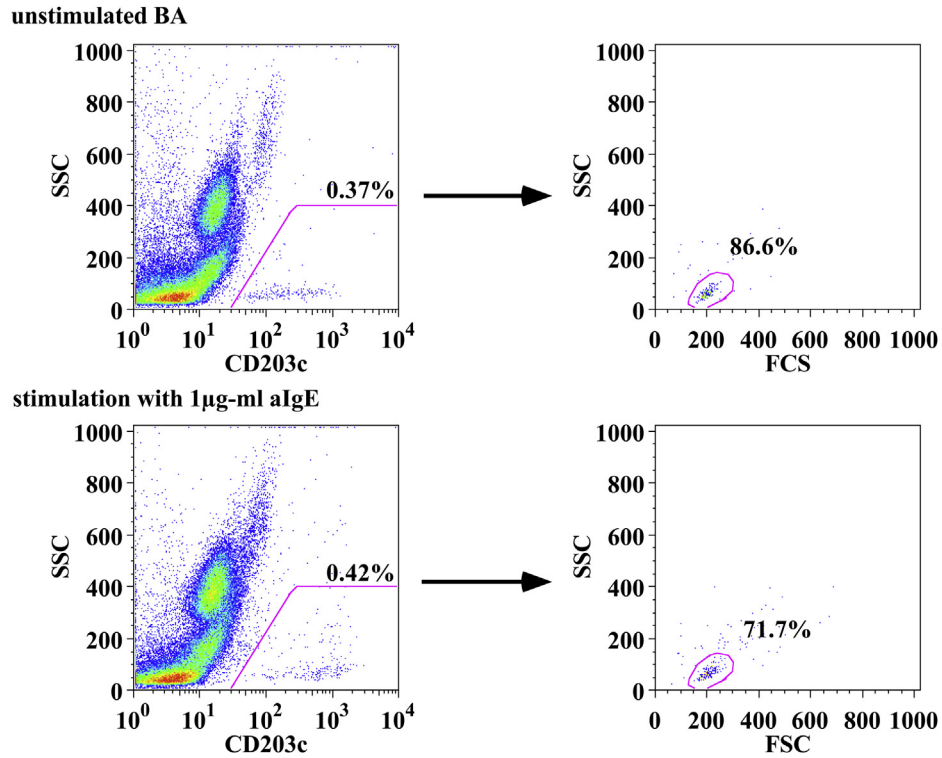

**FIGURE E2.** Gating strategy for basophils in the basophil CD203c activation test. Allergen-induced upregulation of CD203c was determined by multicolor flow cytometry on a FACS Calibur. For these experiments, cells were stained with the phycoerythrin -labeled CD203c antibody 97A6. Basophils were detected on the basis of their SSC and FSC characteristics and expression of CD203c (purple line). *BA*, Basophils; *FSC*, forward scatter; *SSC*, side scatter.

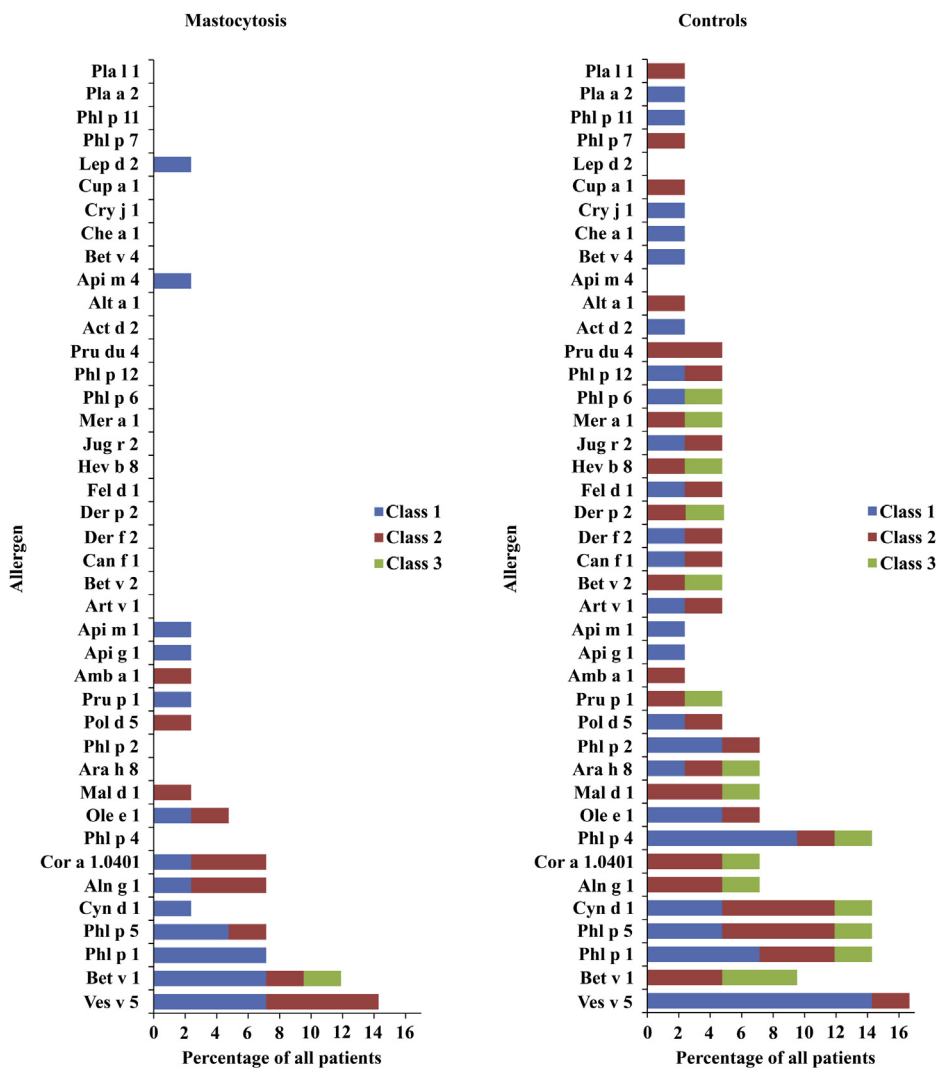

**FIGURE E3.** Profiling of specific IgE reactivities for allergens detected in the sera of patients with mastocytosis compared with age-matched controls. Sera obtained from 42 patients with mastocytosis and 42 age- and sex-matched controls without mastocytosis were analyzed by chip-profiling. Results are expressed as a percentage of patients with mastocytosis or percentage of controls testing positive in the chip assay. Levels of specific IgE are shown as: class 1:  $\geq 0.3 < 1$  ISU, class 2:  $\geq 1 \leq 10$  ISU, and class 3:  $> 10$  ISU. A detailed description of allergens is presented in [Table E4](#).

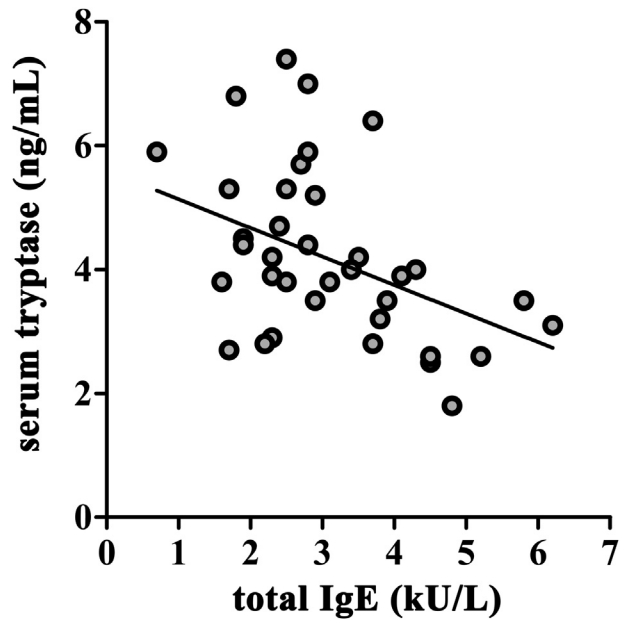

**FIGURE E4.** Correlation between serum tryptase levels and total IgE in patients with mastocytosis. Serum tryptase levels and total serum IgE levels were measured in 37 patients with mastocytosis in whom both markers were determined. Results are expressed in natural log units. A significant negative correlation between serum tryptase levels and total IgE levels was found (Pearson correlation coefficient:  $r = 0.41$ ;  $P < .05$ ).

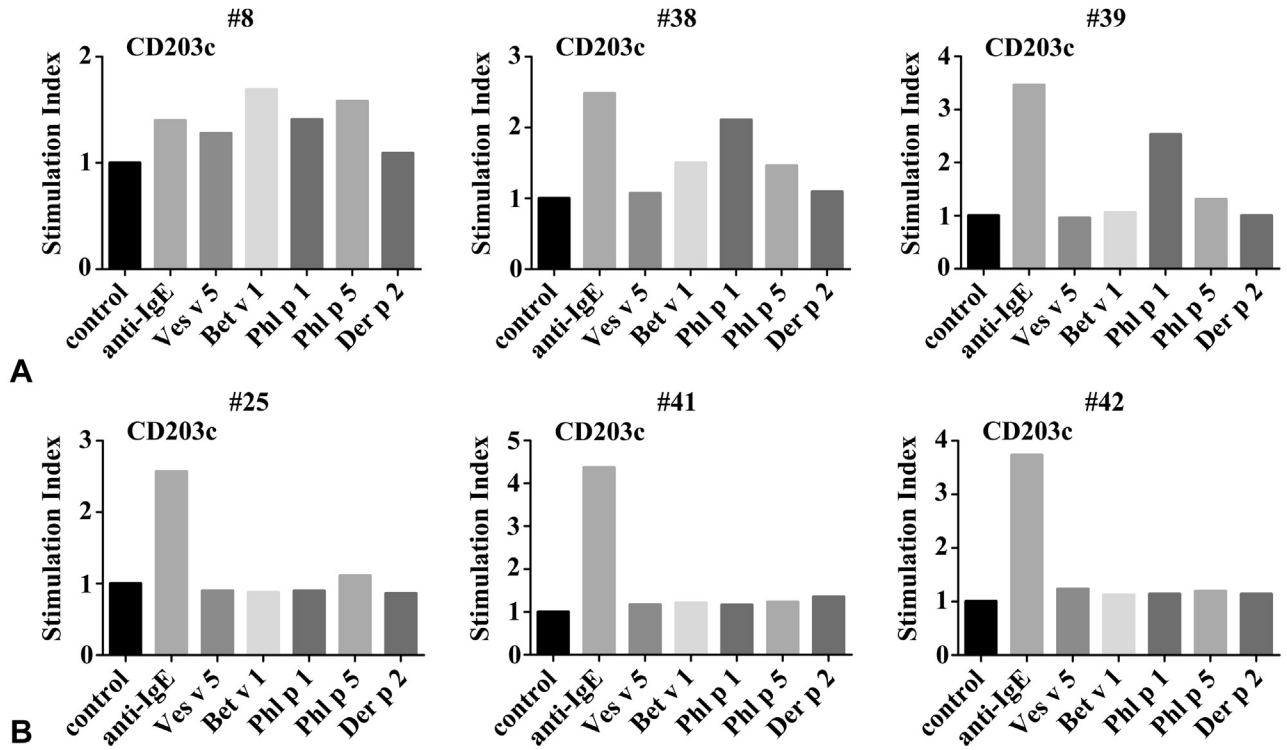

**FIGURE E5.** Basophil CD203c activation test with some of the most frequent allergens performed in our patients with mastocytosis. Patients with mastocytosis with (A) or without (B) specific IgE by allergen-chip-profiling were analyzed: patient number 8 had IgE against Bet v 1, Phl p 1, Phl p 5, and Ves v 5, number 38 IgE against Phl p 5, and number 39 IgE against Phl p 1. Blood cells were incubated with allergens (1  $\mu$ g/mL), anti-IgE (1  $\mu$ g/mL), or control buffer for 15 minutes (37°C). Allergen-induced upregulation of CD203c was determined as described in the text.

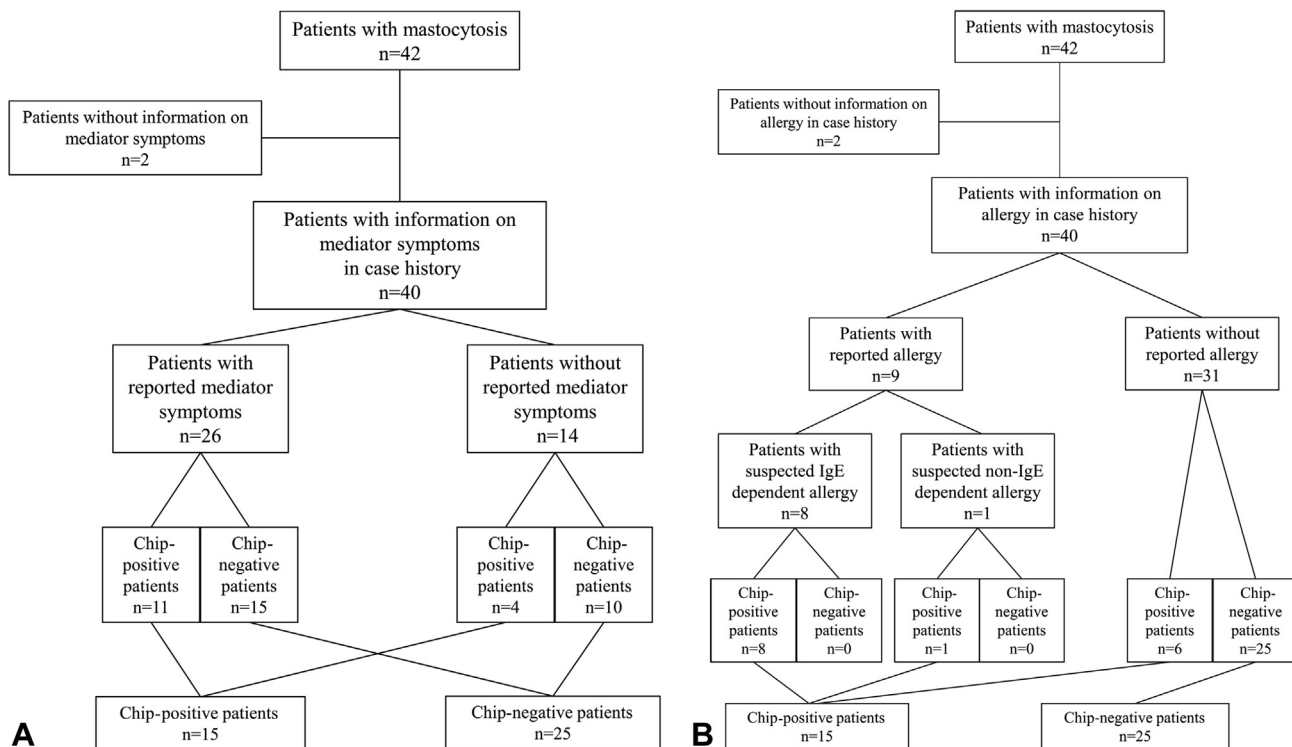

**FIGURE E6.** Flowchart diagram of patients included in the study. Forty-two patients with mastocytosis were included. In 2 patients no information about mediator-related symptoms (A) and no information on allergies in the case history (B) were available. Positive results in the allergen-chip were found in 15 patients, whereas in 25 patients the allergen-chip showed negative results.

**REFERENCES**

E1. Wickman M, Lupinek C, Andersson N, Belgrave D, Asaranoj A, Benet M, et al. Detection of IgE reactivity to a handful of allergen molecules in early childhood predicts respiratory allergy in adolescence. *EBioMedicine* 2017;26:91-9.

E2. Westman M, Lupinek C, Bousquet J, Andersson N, Pahr S, Baar A, et al. Early childhood IgE reactivity to pathogenesis-related class 10 proteins predicts allergic rhinitis in adolescence. *J Allergy Clin Immunol* 2015;135:1199-206.e1-11.

E3. Siroux V, Lupinek C, Resch Y, Curin M, Just J, Keil T, et al. Specific IgE and IgG measured by the MeDALL allergen-chip depend on allergen and route of exposure: the EGEA study. *J Allergy Clin Immunol* 2017;139:643-654.e6.

E4. Skrindo I, Lupinek C, Valenta R, Hovland V, Pahr S, Baar A, et al. The use of the MeDALL-chip to assess IgE sensitization: a new diagnostic tool for allergic disease? *Pediatr Allergy Immunol* 2015;26:239-46.
